# Supplementary material for: Targeting IRS-1/2 in Uveal Melanoma Inhibits In Vitro Cell Growth, Survival and Migration, and In Vivo Tumor Growth
Source: MDPI journal article supplement (doi:10.3390/cancers14246247), 2022-12-19

Supplemental Figure S1

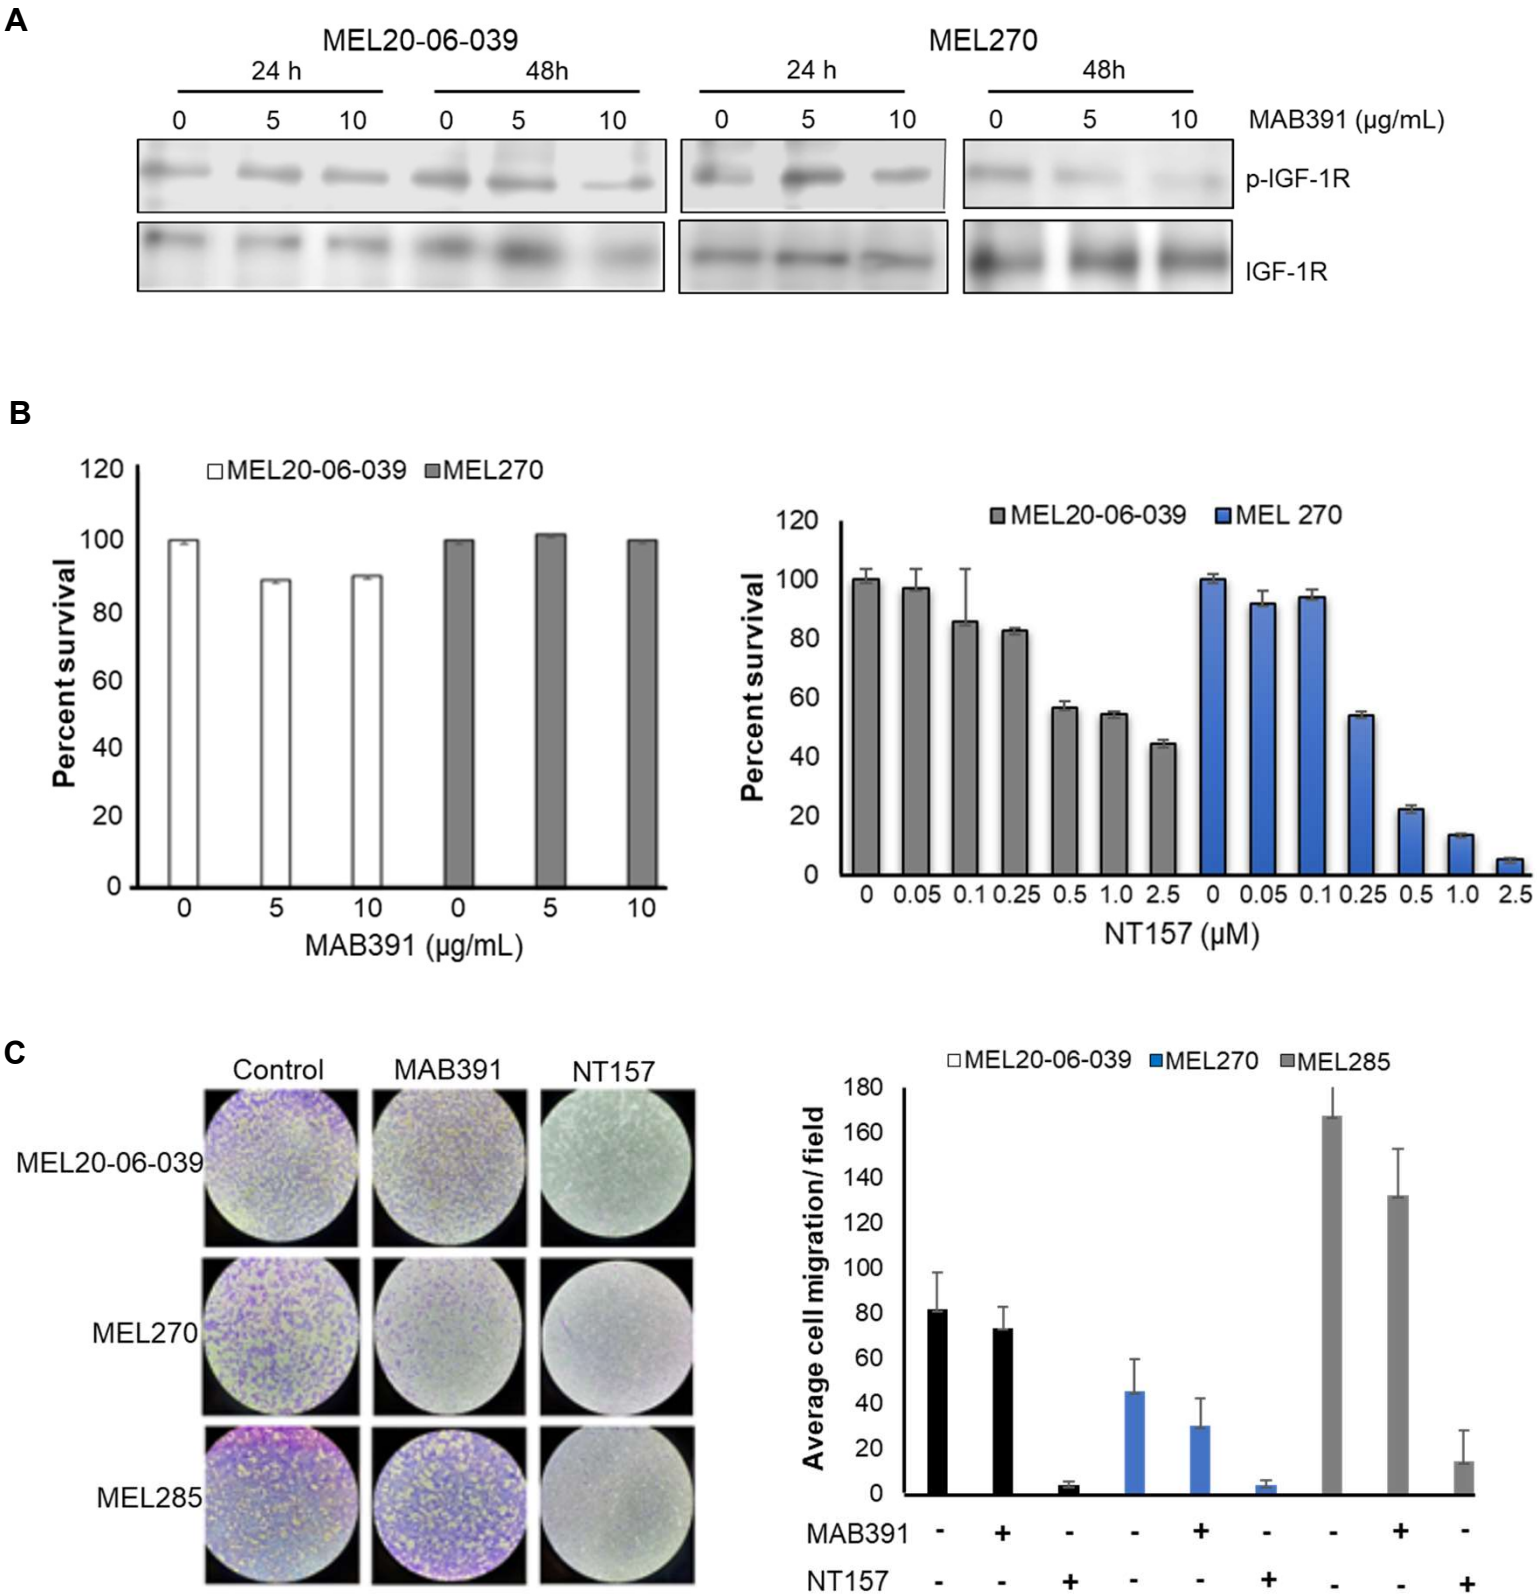

Supplemental Figure S2

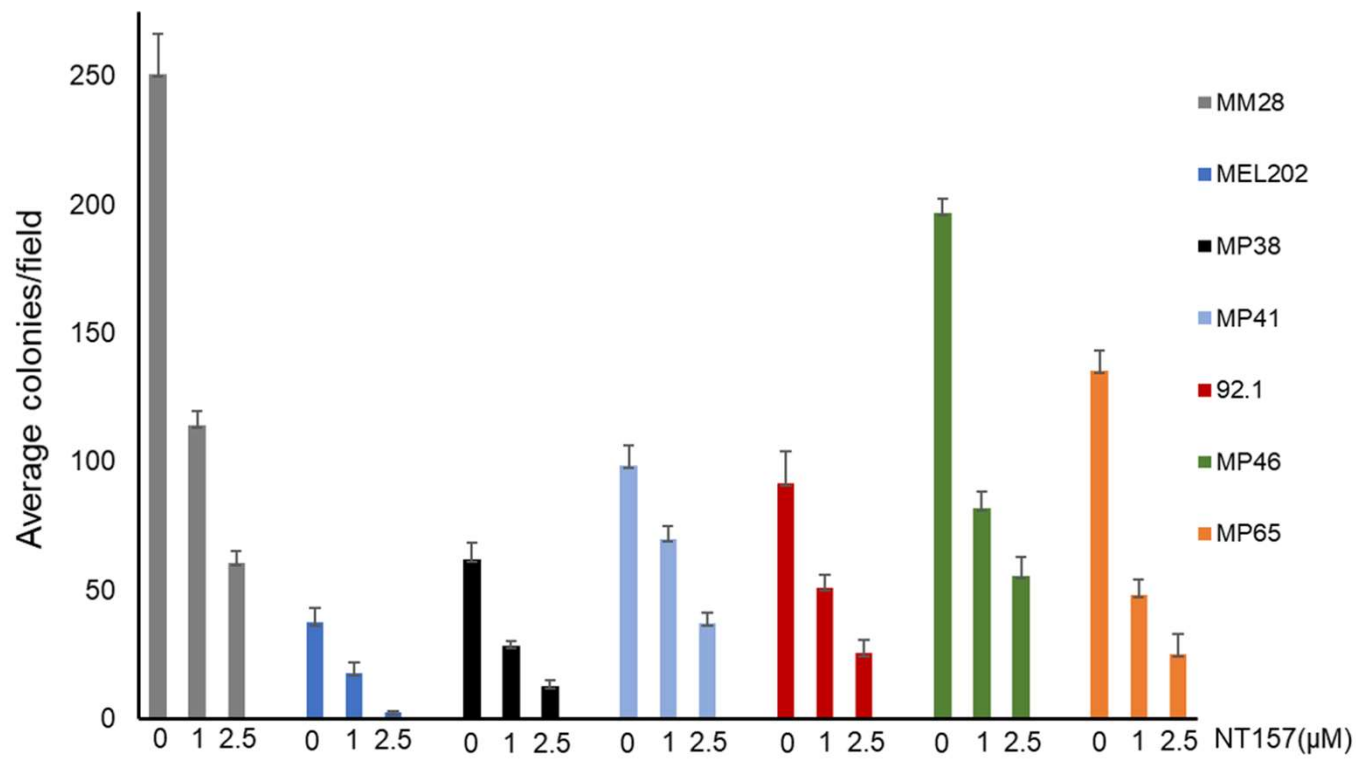

Supplemental Figure 3S: Heatmap of RPPA data set

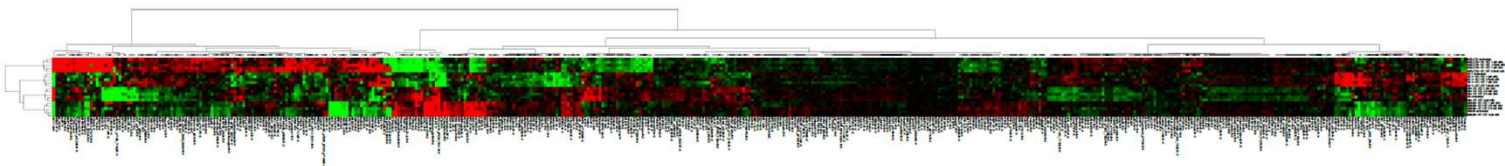

Supplemental Figure S4: Original full gel pictures

Figure 1B

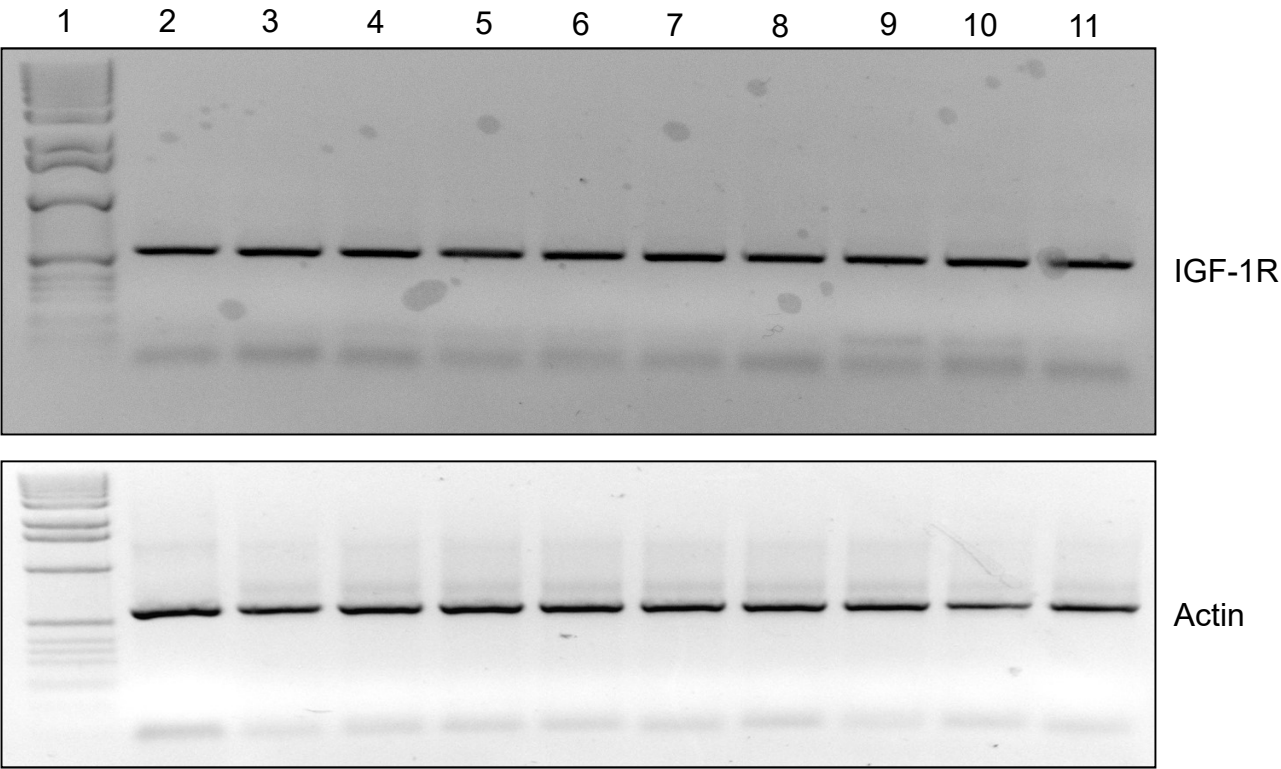

| Lane | Samples |
|------|---------|
| 1    | Marker  |
| 2    | 92.1    |
| 3    | OMM1    |
| 4    | OMM2.3  |
| 5    | OMM2.5  |
| 6    | OCM1    |
| 7    | OCM8    |
| 8    | MEL202  |
| 9    | MEL270  |
| 10   | MEL285  |
| 11   | MEL290  |

Supplemental Figure S4: Original western blots

Figure 1C

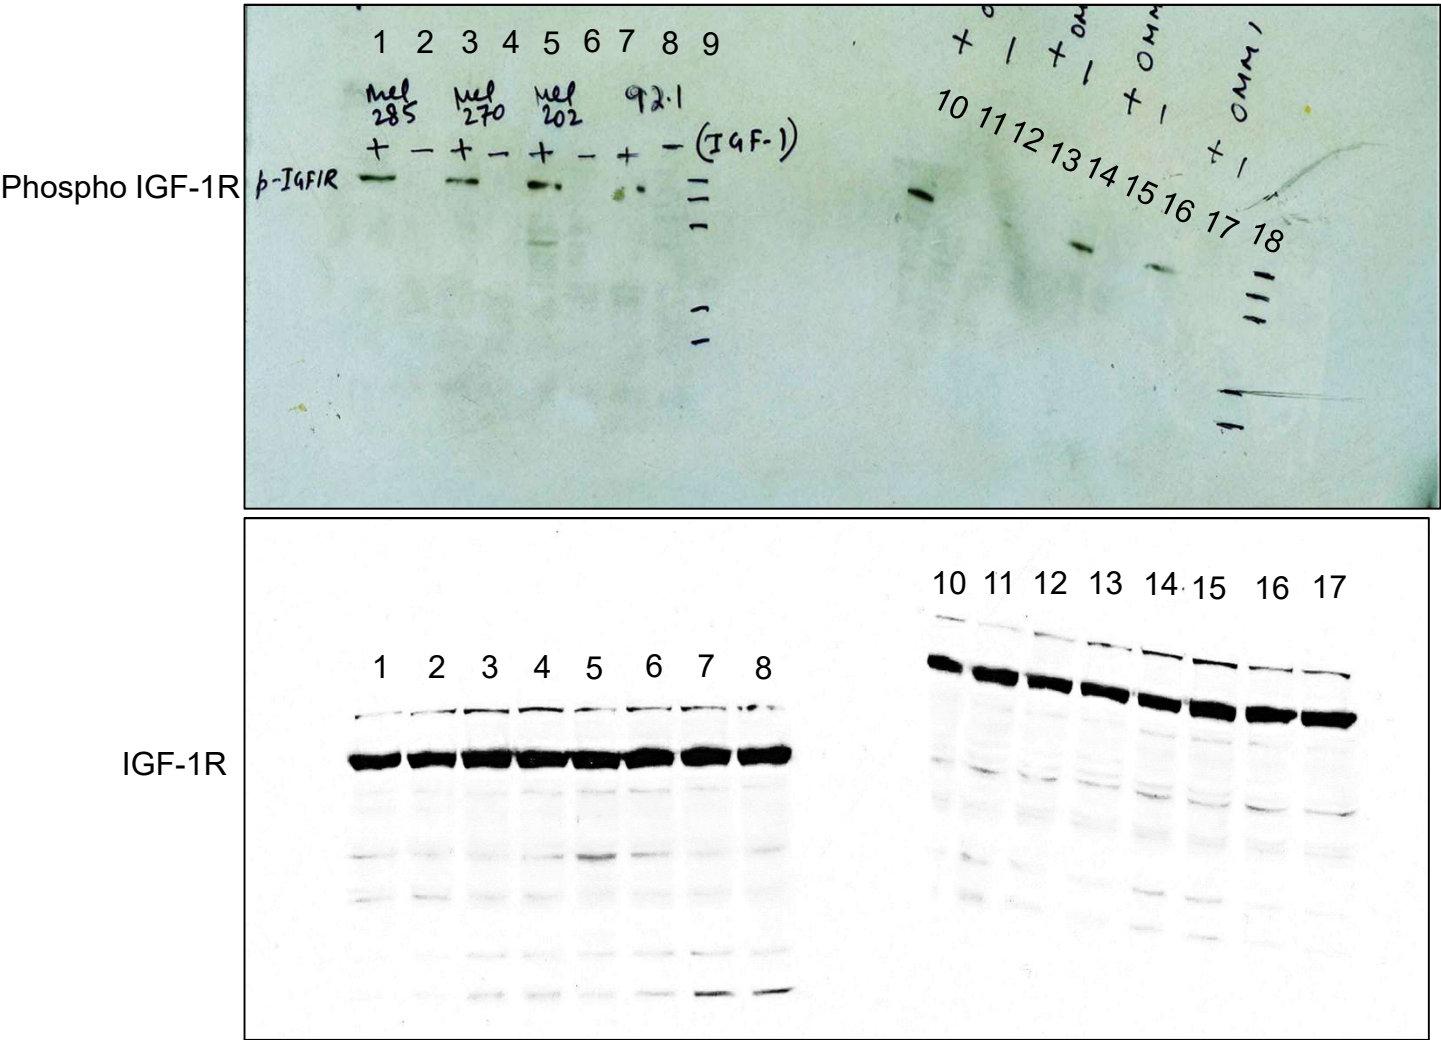

| Lane | Samples                |
|------|------------------------|
| 1    | MEL285; 75 ng/ml IGF-1 |
| 2    | MEL285; Untreated      |
| 3    | MEL270; 75 ng/ml IGF-1 |
| 4    | MEL270; Untreated      |
| 5    | MEL202; 75 ng/ml IGF-1 |
| 6    | MEL202; Untreated      |
| 7    | 92.1; 75 ng/ml IGF-1   |
| 8    | 92.1; Untreated        |
| 9    | Marker                 |

| Lane | Samples                |
|------|------------------------|
| 10   | OCM1; 75 ng/ml IGF-1   |
| 11   | OCM1; Untreated        |
| 12   | OMM2.5; 75 ng/ml IGF-1 |
| 13   | OMM2.5; Untreated      |
| 14   | OMM2.3; 75 ng/ml IGF-1 |
| 15   | OMM2.3; Untreated      |
| 16   | OMM1; 75 ng/ml IGF-1   |
| 17   | OMM1; Untreated        |
| 18   | Marker                 |

Supplemental Figure S4: Original western blots (continued)

Figure 1D

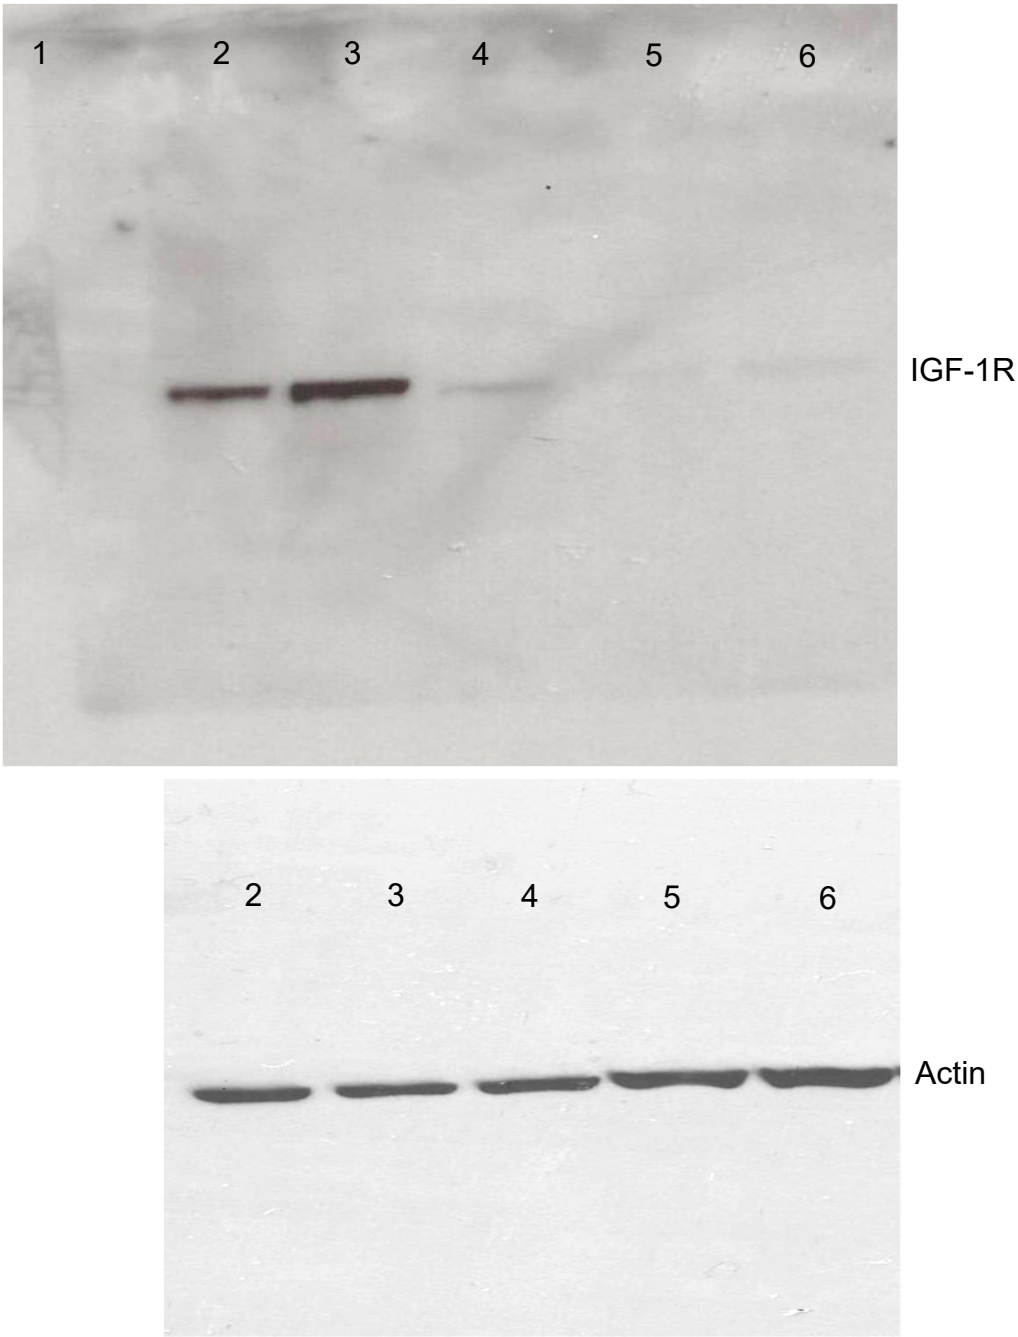

| Lane | Samples       |
|------|---------------|
| 1    | Marker        |
| 2    | 92.1          |
| 3    | MEL270        |
| 4    | Melanocytes   |
| 5    | Keratinocytes |
| 6    | Fibroblasts   |

Supplemental Figure S4: Original western blots (continued)

Figure 2G

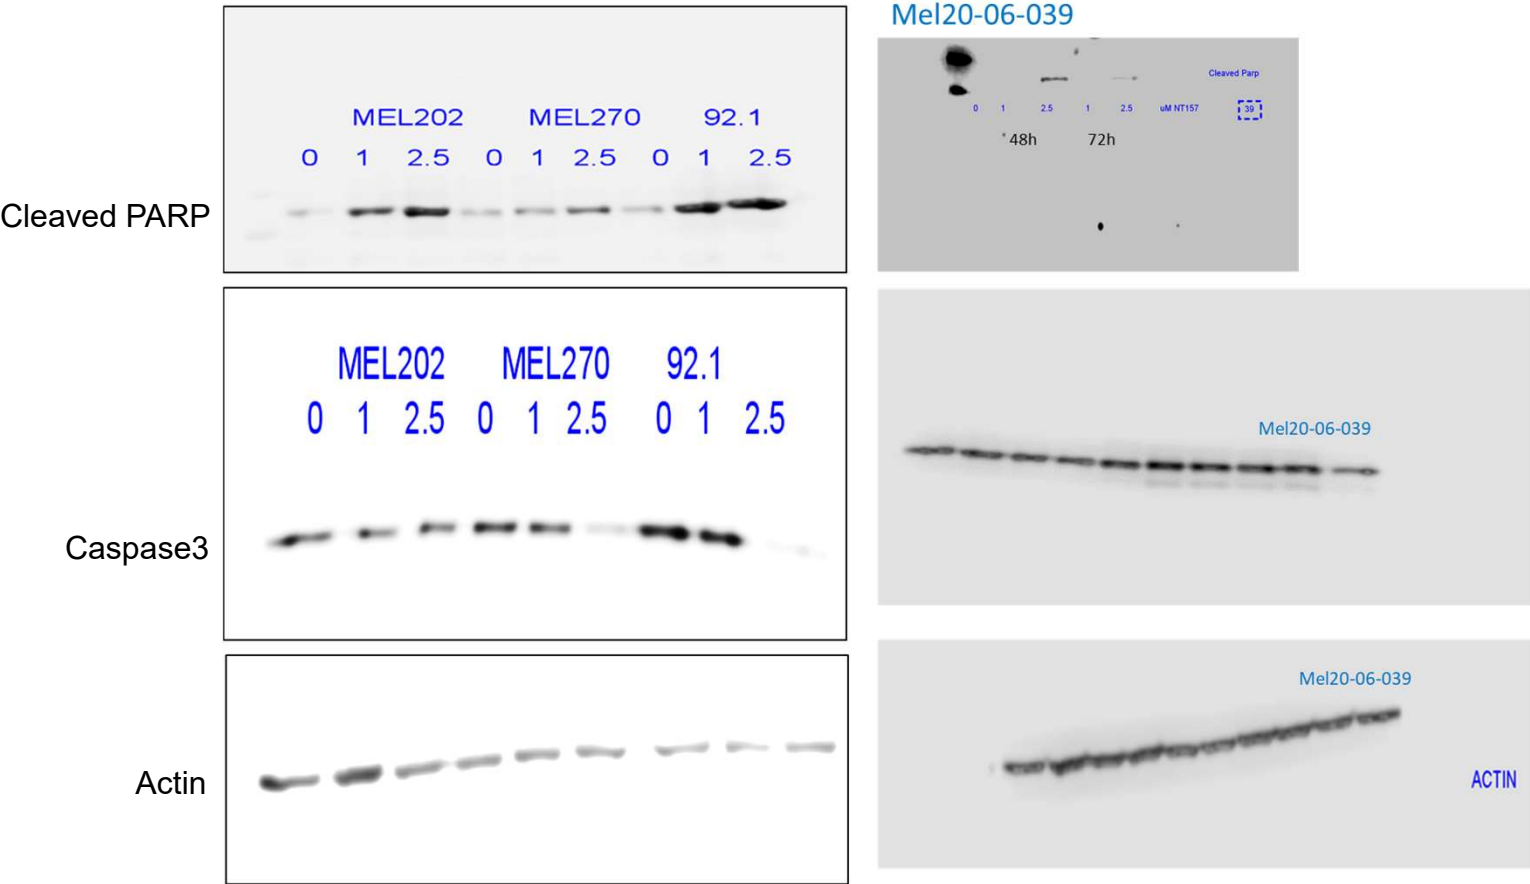

# Supplemental Figure S4: Original western blots (continued)

Figure 3B

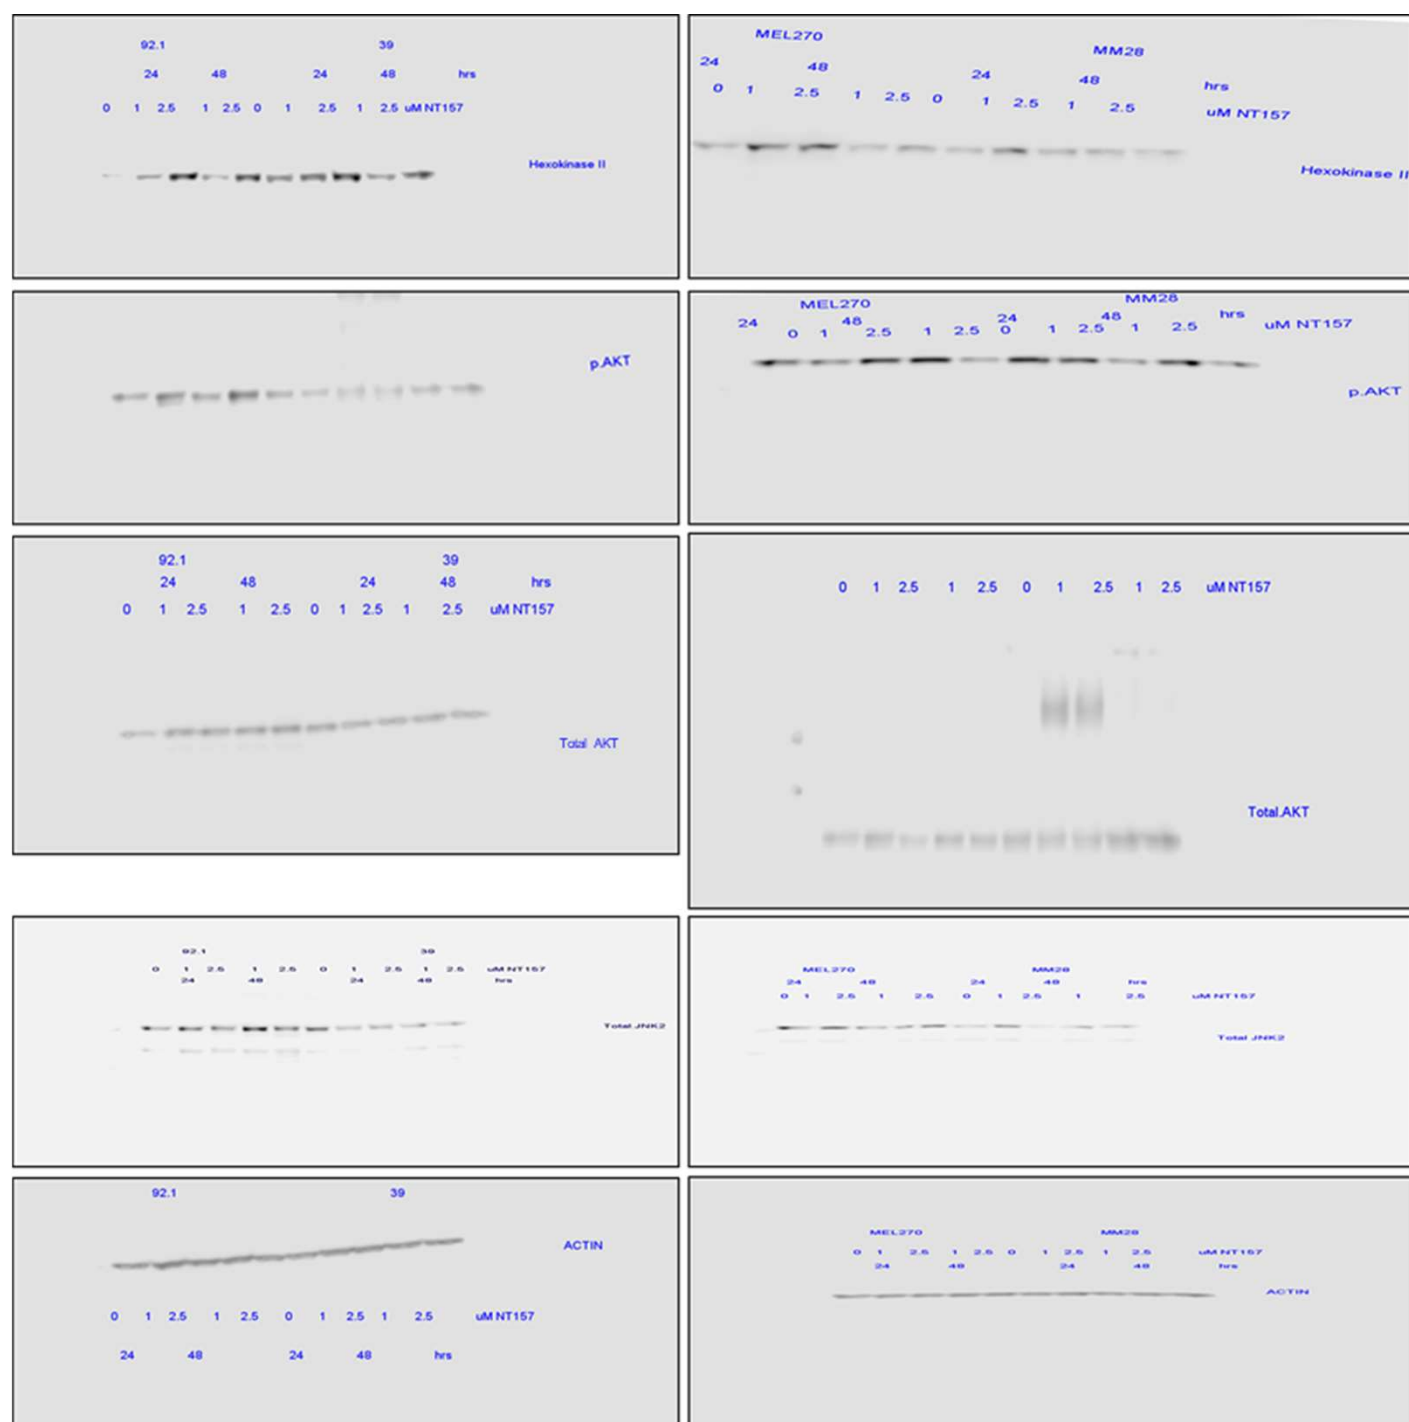

Supplement: s1 [file s1]
